# Supplementary material for: Expression of a Chimeric Antigen Receptor in Multiple Leukocyte Lineages in Transgenic Mice
Source: PubMed Central journal article supplement (PMC4624721; doi:10.1371/journal.pone.0140543), 2015-10-27

S2 Fig

A.

```

AGTGCCCAT TTTCTTCTG GGACTTCTGA CTAGCAGGTG AAAGTTAGAG CCTAGCAGTT
CCTGTTGAGA TAGTATAAAG GCTATTTACT TAATTCTTTG TGGTTTGAGG AAGAGGTGCT
AAGTGTGAGA AACTGTAGTT TATGGCCTCA GAGGATCTCA GAAGGCAGGT CAGCTACAGT
AGCACAGTAA CTTAGATAAG TAAACTTCAT TATACAGCAT CCCTAAATAT CTCATAAGAC
AAAGTCTTAC CCCCAATCTC GTAAGACCAA GTTTTACCAT CCGCTGAAAC TCTTCTCCCT
CCGCTGCTTC AAGAAGCACT CCACCATGGG GCTGCTCCCC ACCACCTCCC CACAGAAAAG
AATACTGATG TTTAGCAACT GACATAGATC CAACTACTTT TTAAAAATATT TGTTTTATACC
CATAGTGGTA CACTACTCTC AGTCTTAATC TCTCCAGTAG ACTGTAAATT AAAACAGAGG
TGTAAGCTAC CTCCACAGGG TACTAAGAAC ATATGATGGC TGAGTGTTAA GCCTTAAATA
AGACATTTAT ACCATCCTGT CTTTAGTTCA CAGAACACTG AATATAGAAT TGAAATGGAA
AAGGATGTAA GAGCTGATAT GGGGAGAAGG CTATAAAGTG ACATCTCCTG GTAAGACACA
GCTATTTCAA TCACAAACTC AAAGCAACCA AAGCTAACTT CACTAAGTAT GCATGAAATG
GACTGTTAA CAGTCTAGTA TGTCTAGATG AGGATCTCAG AAGGTTCTGT TCTTTACTAG
TGGACTGATA GATTTAGGGG AAAGGACTTT TTGTGTCCAT TGATAATTCT ACCAGGTTCC
AATGTATAGT TCTAATTCAA TGGGTAACAG AGATGAATAA ATAAAAATGCA TTACCTATAA
AAATTAGATT TTTATTATCT TAAATAAAAA TGAAATCATG AGATTTGCAA GAAAATGAAA
TGACCTGGTA ATCATTATAT TAAGCAAAGT TAGTCAAACT TAGAGAAATA CTACATATTT
TCCCTTATAG AGTCTAGAGT TAAGTATAGA TATGTACATG TAAGCTTGGC TGCAGGTCGA
AATTGGAATC TAGAAACCTA GTGGGCGCTC TCCAGCTGCC TCTCGTTTTT GTTTTGTTTT
CACTGCCTGG CCTTCTTACC CTAACTGCGT GCAAAGAAAA CAAATTGTTA CCCGGTTTAG
AGAAGAGGGA GAGGACGCGT AGGAAGTCAC AGACGCCAAA AATAGGGGAT AGAAATTGTC
CTGCCTGTA AGGTTGCAA ACGGGAGGGT TTTCAGGTTG TGCCACCCC TACCCATATC
- - - - - Seven copies of VAV-CAR transgene - - - - -
AAGTGTGAGA AACTGTAGTT TATGGCCTCA GAGGATCTCA GAAGGCAGGT CAGCTACAGT
AGCACAGTAA CTTAGATAAG TAAACTTCAT TATACAGCAT CCCTAAATAT CTCATAAGAC
AAAGTCTTAC CCCCAATCTC GTAAGACCAA GTTTTACCAT CCGCTGAAAC TCTTCTCCCT
CCGCTGCTTC AAGAAGCACT CCACCATGGG GCTGCTCCCC ACCACCTCCC CACAGAAAAG
AATACTGATG TTTAGCAACT GACATAGATC CAACTACTTT TTAAAAATATT TGTTTTATACC
CATAGTGGTA CACTACTCTC AGTCTTAATC TCTCCAGTAG ACTGTAAATT AAAACAGAGG
TGTAAGCTAC CTCCACAGGG TACTAAGAAC ATATGATGGC TGAGTGTTAA GCCTTAAATA
AGACATTTAT ACCATCCTGT CTTTAGTTCA CAGAACACTG AATATAGAAT TGAAATGGAA
AAGGATGTAA GAGCTGATAT GGGGAGAAGG CTATAAAGTG ACATCTCCTG GTAAGACACA
GCTATTTCAA TCACAAACTC AAAGCAACCA AAGCTAACTT CACTAAGTAT GCATGAAATG
GAACTGTTAA CAGTCTAGTA TGTCTAGATG AGGATCTCAG AAGGTTCTGT TCTTTACTAG
TGGACTGATA GATTTAGGGG AAAGGACTTT TTGTGTCCAT TGATAATTCT ACCAGGTTCC
AATGTATAGT TCTAATTCAA TGGGTAACAG AGATGAATAA ATAAAAATGCA TTACCTATAA
AAATTAGATT TTTATTATCT TAAATAAAAA TGAAATCATG AGATTTGCAA GAAAATGAAA
TGACCTGGTA ATCATTATAT TAAGCAAAGT TAGTCAAACT TAGAGAAATA CTACATATTT
TCCCTTATAG AGTCTAGAGT TAAGTATAGA TATGTACATG TGATGACACT AGAAAGGGAT
CATGGGAGGG GAGGAAGGCA TCATAAGGAG AGAGAAGCAA GTAAAGAGAAT ACAAATGACC
TGAAGACAGA AAAGTTGCTG CTGTTACCGA GGTGATTCT ACTTCTTTAC ACTGCATGTA

```

B.

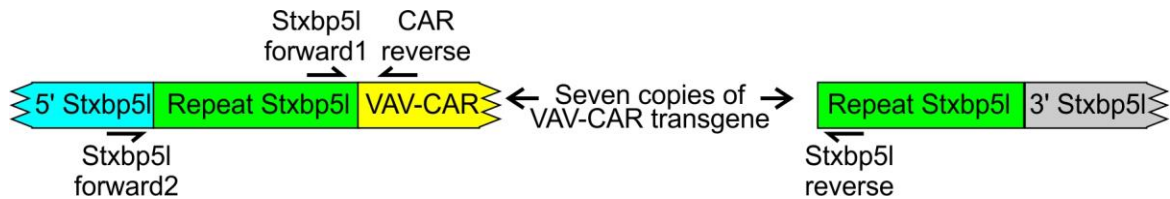

Supplement: pone.0140543.s002.pdf [file pone.0140543.s002.pdf]
