# Supplementary material for: Expression of a Chimeric Antigen Receptor in Multiple Leukocyte Lineages in Transgenic Mice
Source: PubMed Central journal article supplement (PMC4624721; doi:10.1371/journal.pone.0140543), 2015-10-27
Supplement: pone.0140543.s001.pdf [file pone.0140543.s001.pdf]

**S1 Fig.*****Vav* promoter**

1 AATTCGAATCTAGAAACCTAGTGGGCGCTCTCCAGCTGCCTCTCGTTTTTGTGGTTTGTGGTTT 60

61 CACTGCCTGGCCTTCCTACCCTAACTGCGTGCAAAGAAAACAAATTGTTACCCGGTTTAG 120

121 AGAAGAGGGAGAGGACGCGTAGGAAGTCACAGACGCCAAAAATAGGGGATAGAAATTGTC 180

181 CTCGCCTGTAAGGTTGCAAACGGGAGGGTTTTTCAGGTTGTGCCACCCCTACCCATATC 240

241 CTCAGTGCCTAAATGAGACTCAAGCTGGTCCAGTGAAGCCGTTTAGCGCCGCCTAGAGGC 300

301 CATAAGGATAAAAAGGTGGGGTGCTAAGGAAGCGGCTTGGAATCTGGTGGGTAGTCAGGG 360

361 AGAGGCTTGCTTGCCAAGGTAATTTTAGTTCCTGAGAAGCTATGGTCAGGAAAGCAGTAC 420

421 ATATTTGTTAGACAAATCAACTAATAAATGACAGGGAAGGGCACTGGTGACCTTGACTCG 480

481 GACGAGAACTCACAGCAGGGAAGGTGGGCTTATAGTATGATAATTAAGGGTGGAGGAGGG 540

541 CTGTGGCTTAAAAATTTAGGAAGACTTAAGGGAAAAAAAATGACATTTGGGGGCTGGGGAG 600

601 ATGGTTCAGTCAAATGCTTGCTACTCAAATGAGAGGACAAGAGTTCAAATCCCTAGGGCA 660

661 CAATTAAAGCAGGAGGAGGTAGTCTGTGCTCTTTAATCTCAGTGCTCCTAAGACGAGATG 720

721 GGGCAGAGACAATTCTGGAAGTTCAGCTAGCCAGGAGCAGTTAGCCCAGGAGTAAGAGA 780

781 GACTCTATGTTAAGTATGTGGAAGAGAGGGTCTACACTGAGGCTGTCTGCCACCTCAAC 840

841 ACACACGCCATAGTGTCTCTCTCTCTCTCTCTCTCTCTCTCTCTCTCTCTCTCTCTCTC 900

901 TCTCTTTCTCACACACACACATAACAAGTTTTAAAGAAAAAAGGAAAAGTGGGTGGTGAGG 960

961 GTGAGAGGGCTCTGTGGGCAAAGGTGATTGCTACCAAGCCTAATGATCTGAGCTCAATCG 1020

1021 TTGGGGCTTGCATGGTGGAAAGAGGACCTACTCCCCATGTTAACCTTTGACCTCCACAC 1080

1081 ATGTACTGTGCCCCACATGTACCTTCACACATACACACATACATATGTATATATATACAC 1140

1141 ACACACACATATATATATATGTAATAAAAAGTGAAATGGCTTTCAAAGTAGAATATATTTTCT 1200

1201 AATGTTTATTATAGTTCTATTTGTTGGCAGTTTCCTACATGTTAACAACCTATCTTCGTC 1260

1261 CTACCCACCCTCAACTCCCCTCTGACTCCGAATGAGAGTGGACTCTCTTTACCTTATCCC 1320

1321 CACTTTCTTGCTCTTTTGTAAACCCTTTGCATCCATTACTGCTGCCTGTGGGCATGTTGGC 1380

1381 TCCCTCCTGGCTTTGTCTTGTGCTGCCACCATAACTGCACGGAGTTCATGAGCGTAGTGG 1440

1441 CCATGGGTATGCCCTGGAGATAGCATTTACATCCCCGCCCCGACTCTTACCGACTTT 1500

1501 CTGTTCCCTTCTCCCTTGAGCCTCGGGCTGGTGGTGGTATAGATGTCCATCTATGGCTGA 1560

1561 GCACTCAGTAATCAAAAAGTAACATGTAAGAAGTGATGGAGTGAATTAGTGTCTTCTGTC 1620

1621 AGGTGGTGGGCACAAGTGCAAAGGCCCTGGGGCAGGATGGAGGTCAGGGAGTGAAGAACA 1680

1681 GAGAGAGGAGAAGAGGCTGGCAGGGGTTGGGGCAGGGTGAACAGGGCCTTGTGGGGTGCA 1740

1741 GGAAAGACATGAGTTTTGGCCCCAAGCAAGGTTGAACCAGGAGGGTTATGGGTGGTGA 1800  
1801 AGAATGGTTGAGACTTGACTCAGTGTTTCAGTGGTCCCTTTTGGCTGCTGCAGGGGCAAAA 1860  
1861 GGCTGTGAGAGATCAGGGCCGTAGACTGGGGACCAGGAGGAGACAGGAGGTGACAGCCTA 1920  
1921 GGTGCCTACGGCTGGATGAGATAGTGGCACCTTAGTTCAGCAGGTGCCCAGGTCTGCTCA 1980  
1981 GTGTAGGTGGAGAAAAGACGAGGTCACACCAGTGAAGCTGTGAGGGCGTAACTGCA 2040  
2041 GATGCTGCTCCCCCTCCGCCCCACAGCTCCTCCCCACCCCCACCCCGGGGCGACAGTTAC 2100  
2101 AGTCACAGAAGAGGAAGTGGTGTGTAGTTGTCCCCACTGGGGCAGGCGGCGCGGTGGT 2160

### SV40

2161 GAAGGAACGAGGGTGCACGGGGCCCTCCCCGAGGGGCCAAGTGAGAGGCCGGC **GCGCCTGA** 2220  
**2221** AGGGGTCAATTTCGAAGTTCCTATTCCGAAGTTCCTATTCTCTAGAAAGTATAGGAAGTT 2280  
**2281** CACGCGTGAAGTGAACCAAGTAACTGGTAAGTTTAGTCTTTTTGTCTTTTATT 2340  
**2341** TCAGGTCCCGGATCCGGTGGTGGTCAAATCAAAGAAGTCTCCTCAGTGGATGTTGCCT 2400  
**2401** TTACTTCTAGGCCGTACGGAAGTGTACTTCTGCTCTAAAAGCTGAGATCTGGCCCGTA 2460

### Chimeric Antigen Receptor

**2461** CGGCCCCACC**ATGGATTTTCAGGTGCAGATTTTCAGCTTCCTGCTAATCAGTGCCTCAGT** 2520  
M D F Q V Q I F S F L L I S A S V  
**2521** CATAATGTCTAGACAGGTACAACCTGCAGCAGTCAGGACCTGAAGTGAAGAAGCCTGGAGA 2580  
I M S R Q V Q L Q Q S G P E L K K P G E  
**2581** GACAGTCAAGATCTCCTGCAAGGCCTCTGGGTATCCTTTACAAACTATGGAATGAAGTGA 2640  
T V K I S C K A S G Y P F T N Y G M N W  
**2641** GGTGAAGCAGGCTCCAGGACAGGGTTTAAAGTGGATGGGCTGGATTAACACCTCCACTGG 2700  
V K Q A P G Q G L K W M G W I N T S T G  
**2701** AGAGTCAACATTTGCTGATGACTTCAAGGGACGGTTTACTTCTCTTTGGAAACCTCTGC 2760  
E S T F A D D F K G R F D F S L E T S A  
**2761** CAACACTGCCTATTTGCAGATCAACAACCTCAAAAGTGAAGACATGGCTACATATTTCTG 2820  
N T A Y L Q I N N L K S E D M A T Y F C  
**2821** TGCAAGATGGGAGGTTTACCACGGCTACGTTTCCTTACTGGGGCCAAGGGACCACGGTAC 2880  
A R W E V Y H G Y V P Y W G Q G T T V T  
**2881** CGTTTCCTCTGGCGGTGGCGGTTCTGGTGGCGGTGGCTCCGGCGGTGGCGGTTCTGACAT 2940  
V S S G G G G S G G G G S G G G G S D I  
**2941** CCAGCTGACCCAGTCTCACAAATTCCTGTCCACTTCAAGTAGGAGACAGGGTCAAGTAC 3000  
Q L T Q S H K F L S T S V G D R V S I T  
**3001** CTGCAAGGCCAGTCAAGGATGTGTATAATGCTGTTGCCTGGTATCAACAGAAACCAGGACA 3060  
C K A S Q D V Y N A V A W Y Q Q K P G Q  
**3061** ATCTCCTAAACTTCTGATTTACTCGGCATCCTCCCGGTACACTGGAGTCCCTTCTCGCTT 3120  
S P K L L I Y S A S S R Y T G V P S R F  
**3121** CACTGGCAGTGGCTCTGGGCGGATTTCACTTTACCATCAGCAGTGTGCAGGCTGAAGA 3180  
T G S G S G P D F T F T I S S V Q A E D

3181 CCTGGCAGTTTATTTCTGTCAGCAACATTTTCGTA CTCCATTACGTTCCGGCTCGGGGAC 3240  
 L A V Y F C Q Q H F R T P F T F G S G T

3241 AAAATTGGAGATCGAACAAAACTCATCTCAGAAGAGGATCTGAATGGGGTCACCGTCTC 3300  
 K L E I E Q K L I S E E D L N G V T V S

3301 TTCAGCGCTGAGCAACTCCATCATGTACTTCAGCCACTTCGTGCCGGTCTTCCTGCCAGC 3360  
 S A L S N S I M Y F S H F V P V F L P A

3361 GAAGCCCACCACGACGCCAGCGCCGCGACCACCAACACCGGCGCCCACCATCGCGTCGCA 3420  
 K P T T T P A P R P P T P A P T I A S H

3421 CCCCTGTCCCTGCGCCCAGAGGCGTGCCGGCCAGCGGGGGGGCGCAGTGCACACGAG 3480  
 P L S L R P E A C R P A A G G A V H T R

3481 GGGGCTGGATCCTAAGCTGTTTTGGGCAC TGGTCGTGGTTGCTGGAGTCTGTTTTGTTA 3540  
 G L D P K L F W A L V V V A G V L F C Y

3541 TGGCTTGCTAGTGACAGTGGCTCTTTGTGTTATCTGGACAAATAGTAGAAGGAACAGACT 3600  
 G L L V T V A L C V I W T N S R R N R L

3601 CCTTCAAAGTGACTACATGAACATGACTCCCCGGAGGCCTGGGCTCACCCGAAAGCCTTA 3660  
 L Q S D Y M N M T P R R P G L T R K P Y

3661 CCAGCCCTACGCCCTGCCAGAGACTTTGCAGCGTACCGCCCCCTCGAGAGAACAAAATT 3720  
 Q P Y A P A R D F A A Y R P L E R T K F

3721 CAGCAGGAGTGCTGAGACTGCTGCCAACCTGCAGGACCCCAACCAGCTCTACAATGAGCT 3780  
 S R S A E T A A N L Q D P N Q L Y N E L

3781 CAATCTAGGGCGAAGAGAGGAATATGACGTCTTGAGAGAAGAAGCGGGCTCGGGATCCAGA 3840  
 N L G R R E E Y D V L E K K R A R D P E

3841 GATGGGAGGCAAACAGCAGAGGAGGAGGAACCCCCAGGAAGGCGTATACAATGCACTGCA 3900  
 M G G K Q Q R R R N P Q E G V Y N A L Q

3901 GAAAGACAAGATGGCAGAAGCCTACAGTGAGATCGGCACAAAAGGCGAGAGGCGGAGAGG 3960  
 K D K M A E A Y S E I G T K G E R R R G

3961 CAAGGGGCACGATGGCCTTTACCAGGGTCTCAGTACTGCCACCAAGGACACCTATGATGC 4020  
 K G H D G L Y Q G L S T A T K D T Y D A

**SV40**

4021 CCTGCATATGCAGACCCTGGCCCCTCGCTTTAATTAAGCGGCCGCAGACATGATAAGATA 4080  
 L H M Q T L A P R F N \*

4081 CATTGATGAGTTTGGACAAACCACA ACTAGAATGCAGTGAAAAAATGCTTTATTTGTGA 4140

4141 AATTTGTGATGCTATTGCTTTATTTGTAACCATTATAAGCTGCAATAAACAAGTTAACAA 4200

4201 CAACAATTGCATTCATTTTATGTTTCAGGTT CAGGGGAGGTGTGGGAGATTTTTTAAAG 4260

4261 CAAGTAAAACCTCGCGAGCCGAAGTTCCTATTCCGAAGTTCCTATTCTACGTAAAGTATA 4320

4321 GGAACTTCGCCCGGGCGGATCCACTAGAGAACCCCTTCGCGCGCCAGCGGATCCACTAGT 4380

**Vav promoter**

4381 CACGTGAACTTGCCGGCCCCAGATGTCCAGGTGAGTCTGCTGGGTGATGCTAGGGCCCCGA 4440

4441 CTGGATAAAGGCTGGTAGGCCCGGCTCTGGCTATGGAGAGGTGTCGAGCAGAACGGAGCT 4500  
4501 CTGGGTGGGTTTGTACTCTTTGGTTGGCTTGCAGCTGTCCCAGCAAATTTAGGGGGAAA 4560  
4561 TCTCCCTATCCCGCCCCGCCCCAGCTGACTCTGTTGAGATCCATTTAAAGGGGTCCTAA 4620  
4621 GAGGTATCTTGTTCCTCGTAGTTAGCCAAGAGGGTGCATGAGGTTGGAGAACCAGATTC 4680  
4681 AAGAGAGAGAGGCCTTCAGTTTCTCCCCACCGGTGGCTCCTCCTCTTCCACCTCTTCTG 4740  
4741 CCCCCCTCCTCCTCACATCTTCCCTTCCCTCCATTTCCCTGCCAGGGCTTTGTGCTGTGTG 4800  
4801 GCGTGGAGTGTGGGGGCTGCAATGCGAGACCCTGTGGCATCCCAACTCTACCTATTTTCG 4860  
4861 GGAAGGGCCCATTTGAAGTGCAGGGCCAGGCCTAGGGTCCTAACAAGGCCCTGGGTGTCC 4920  
4921 CTGAGTTTGACATCTGTGCACTCTCCGTGTTTCAAGTGGAGGCATGGTCAGACTATGCC 4980  
4981 CGGTGAGCCTAGAAAATGTATTCAAATCCTTATTTGAATGTGGCTGGGGTGGTGGTAAA 5040  
5041 GGTGACTGGTGGCTTTGTACTCTTTTCTCTGCTTCCCCAGGGATGCTGGGTTTCGGGGG 5100  
5101 AGGGCTGATAGCCCTAGAAAATGAAAGGTATAGGTTCAAGTCAAAGGGATCGAGATCTAGA 5160  
5161 TATCGATGAATTCGAGCTCGGTACCTGCCGTCATGTATCCACACACAGCCCTTCACTGGT 5220  
5221 GGATTCTAGGCAGGGCTCCACCTCTGACCTCGTCCCCAGTCCCTCACTAGTGAATCTAGG 5280  
5281 GTAGGGGCTCCACTCAGAGTCACATCCCAGCCCTTAGAGATTTTTATATTTTGAGTGGAG 5340  
5341 CTGATTGTCAGGAGTCTAGGTTGCACAGCTTTGTGTGTGTCACTGTAGATGTTCCGAGAC 5400  
5401 TCTTGTTGTTTTTTGTTTTTTCAAGACAGGGTTTCTCTGTGTAGCCCTGGCTGTCCTGG 5460  
5461 AACTCACTCTGTAGACCAGGCTGGCCTTGAAGTCAAGAAATCTGCCTGCCTCTGCCTCCA 5520  
5521 AGTGTGGGATTTAAAGGCGTGCGCCATCACGCCAGCTTAGAGACTTTTTTTTTAAAGT 5580  
5581 GGAAGCACCTGTACCTTGAAGGTCACCCCGTCCAGCCTTCTCCATACACTGTCCATTA 5640  
5641 CCGCTCTGACTTGCTGTGGCTGCCAGCTGAGCCCCACTTTCCCCTGCACTACCCACAGC 5700  
5701 TGTCCAGTTGTCTGTCCCTTGTACTGTGTACCTCAGCTGTCTGTACTTCCATCACACAC 5760  
5761 TCCAGTTGCTGTTACCAATTGATACCCAGATTGCTTTGTGCTGGAAGCCCCCTCCTGTTA 5820  
5821 TCTACCCACCTCTCCAGGTTATAAGCACTGGGGCATCAGGGTCATGTTTTCTCACCCTA 5880  
5881 CTAAGGGTCTCAGGGCTGGGTAAACAGTAAATGCTTAATATATGCTTTTGGAGTCAACT 5940  
5941 AATGTCTGGGTTTTTGGTCAAGGCTTTGTGTTAGTGCTCAGTTCATAAGTGGAGAGGTTGA 6000  
6001 TTCTCCTTCTCTCTGTTCTTCTGGCTTTCGCCTTCTCTCCCTCTCTCCTTCTTTCCTTTT 6060  
6061 CTCTCTTTTCTCTGTTCTTCTTCCAACCCCTCCACATTTGTCCCTCTCCTTCCCTTCCCTA 6120  
6121 TTCCCTCATCTTTTATCGTATGAATAACATTTTGTCTCCTGGGGGAGATGTGAACACGTG 6180  
6181 TCTACTCGTCTCAGACAGGGCCAACAGCCAGGAAAAGCAAGGATCCCGCCAAAGTCCAAC 6240  
6241 TTGATGAAGCACTGAGTGTCACTGTGTTACAGATAGGAATGTGGGTGAGGGCTCACTTAA 6300

6301 CAGGAACAGAAATGGCTCAAATACAGCTGTATCACCAAAGCCTGGCATGGATGGTGGGCG 6360  
6361 ACTCAGGAAAGCTGCCTTCAGGCAGCTCTGAAAGGTGGACAGTTGTCTCTTCTAGGTGCC 6420  
6421 TTGTCTGTCTGAACCTCTTCTGGGCAGTTCAGCTTGTCTTGAGAGCGGTACCAGTAGT 6480  
6481 CCTTACAGCTTGTGCTTGGGGAGGGCAGTGCCTAGAGAATCTGGTCTGTTTCAGGAAGTT 6540  
6541 CCTGCATATCTCCTGTTGTTTCCTGAGCTTACGGGCTTTTCTGTAGGCTAGAATGCTTC 6600  
6601 ACCTCCACTTAGCACATCCTATGTCTTAATGAGCTTCCTTCCAAGGTGGAAGGTTTCGTC 6660  
6661 TTAAGGGAAATGCTACACAGCACCTCTTTCCCCCTCCCTCTGCCTTCTCTCCCTTCCA 6720  
6721 CTATCTTCTCCCCTCACCCCTGTTTCCCACCCCTGTTTTTGACACAGGGTCTCACTGTGG 6780  
6781 TTCCCTGGACAACCTGGAAGTCACTCTGTAGTCCATGCTTACCTCAGAGTTTAGCCATCC 6840  
6841 TTTGCTCTGCCTCCTCTTCCCTGAGCGCGGAGATTACAGGTATATTCCACCACACTGGGAT 6900  
6901 TTCATTTCTGATTTTTGGTTGGAGAACCCAAGGCAGGATGACCTGTCCAAGGTCCCCCTG 6960  
6961 CTTACCAGTTTCAGCTGGGAGTCACCAGACACCTAGTTGTGGAAGGCGTACTGGGGTGTG 7020  
7021 AGGTGACAGGAAAGAAGAGGAAGTCTGATTCCCAGAATGCTTTAGACTCATGCTGAAGA 7080  
7081 GTTGGGTCATCAGCTCCTCAATTCAAAGCTCTGGACAGGATGAGCAGCGTGACCACCCGC 7140  
7141 TCTGGGAAGCCTCAGGGAGCTAGCTGGAGTCTGAAAGATTACAGGGCTGAAGGAAGGCAG 7200  
7201 AGAGCCATGCCTCTACCCCTTGTCTATCTTCCCAGCCAGGCCTGGTAACAGGCATTTCC 7260  
7261 TGTTTCCGGCCATCTCCTGGGTTTGGGTTGTGGGTGTGGAAAGCGCAGAAGGCAGAATTT 7320  
7321 GTGTTGAGTCTGGGCCGCTTTCTCCCAGCCCCAAGAGAGGCCACTGTCCTTACTGCTAC 7380  
7381 TTCCTTGAACAGAATTCTCTCTATTTTTGGGCAGAGGCACCAAAGCCAAGTTCGGCTTG 7440  
7441 ATCACAGTGCCTGGCTCCTGATTTGCCTAAAGCCTTCTTGCTTGTCTAGCGCCATGGTCT 7500  
7501 TCTTTCGTCCCGGAGGATAAGGGAAGCAGAGGGGTTGTCCCTATAAAACAAGGAAGAATT 7560  
7561 CTCCTTCCACGTGCCTCCTACAGTGAGTGGCTTCCTGTCCCTTCATCATCTTTTCACATGC 7620  
7621 CTTACGGTGCCAGGAAGTTCTTCTGGTGGTCTAACCACAGTCACCGTGCTTTCTGAAGGA 7680  
7681 GCCCAGCTCTCTAACTAGCTACTCTGAAGCGGTGGAAGGGGTTATGAATCATACTCCTTT 7740  
7741 TGGAAGAGTCATGTGACTTGAGGGAAGGCAGTCTCAAAGCTCAGCTGATTCTCTGAGGTT 7800  
7801 AGGAGGGGGATTCCTTCCTTAGGCCACACAGACCTAAGGCCAGACATCACCTCTGGTGT 7860  
7861 TGGTCTGCCAGCCCTGTCTGCCTGTCTATGGCCACAGGACTTCTGAGTGCTGTATATAA 7920  
7921 TGGTGTATATAATTTCTGTGATATGCTGGTCCCTGTTATGTCCCCGTGAGGCCTGGGCGA 7980  
7981 GGGGGCTGTGGTGGCTCAATGTGGTTCAGGAGCTAGGGTAGAGCAGGAGTGGGGCTGGGT 8040  
8041 TCTGTGTGTTTCTCCACACTCCTGCTTTTACATGTGTGACTCTGGCAGGTGACAGCCCTG 8100  
8101 TGACAAGCCTCAGTTTTCCCACCTGTCAGATAGAAGTCCTTTGTTTAGCCATTTCTGCTT 8160

8161 TCACTTGTGCGTGTGTGTATTTGTATGCATTTGTGCATGTTTATTATTACTATTATATTG 8220  
8221 TGTGTGTGTGTGTGTGTGTGTGTATGGGTGCAGATGCCTGAGGAGGCCAGAAGAGGGCAT 8280  
8281 TGGATCCTCCTGAGTTGGACTCACAAGTGTGTGTGATATGGGATGGAAACCAAACCTTGAC 8340  
8341 TCCTCTGTGAGATGGACAGTGCCAGCACCCCTGAACATTCTCGTGGGTTTAAGCATTGAA 8400  
8401 CCCAGGGCCTTGCTTTAGCAATTGAGTTGCCTCTCAGACCTCCTTCAATAACTTAGAAAT 8460  
8461 TAGAGCATATTTTTTTTTTTGGCAGTTTGGTCTGTGTACATATGTATTTTGATCATGGCCG 8520  
8521 CTCTACTCCCTTGCTTTTTTTGTGTTGTTGTTGTTGTTGTTTTTTTTTTTTTTGTGTGACC 8580  
8581 CAGTGAGTTGAATTAGAGTTTGTGACAGGAGTCAGGGTGAGGGGTCATGTACCAGTGGCT 8640  
8641 GCAACACTGAAGAAAATGCCTCTCCCTCCCTGGAAGCTGTTAGCTGCCTACAAATCCCC 8700  
8701 AGGGAGGAGTGGGTCCCTCATTTGACTCCCCACTCCTTCAACACAACAACCTTCTCTTGAGC 8760  
8761 TCCACCCAGCCCCAGGTCTTTAAATAGTTGTCCACATGGAAGAGCGAGCCCTTGAGTGA 8820  
8821 CCTGTGGCCTTAGGTAATGGTGGAGTGCATGTAGGGTTGATGACTGTCACAAGTGGACC 8880  
8881 AGTTGTCTGTGGGGAGTTGATGGTGTGAGGCTGTATACATGGAGACAGAGCTCCATTTG 8940  
8941 GCTGACAATCCAAGATAGCTGAAAAAAAAATAGTTTAAATCTGGGGCTGTGCCTCAATGGG 9000  
9001 AAGAACATGTGTCCAGTGTGCACAGAGTCCTGGGTACC 9038
